# Supplementary material
Source: Springer Nature journal article supplement (https://www.springermedizin.de/resource/supplementary/13054_2005_3723_MOESM3_ESM.pdf/9721144)

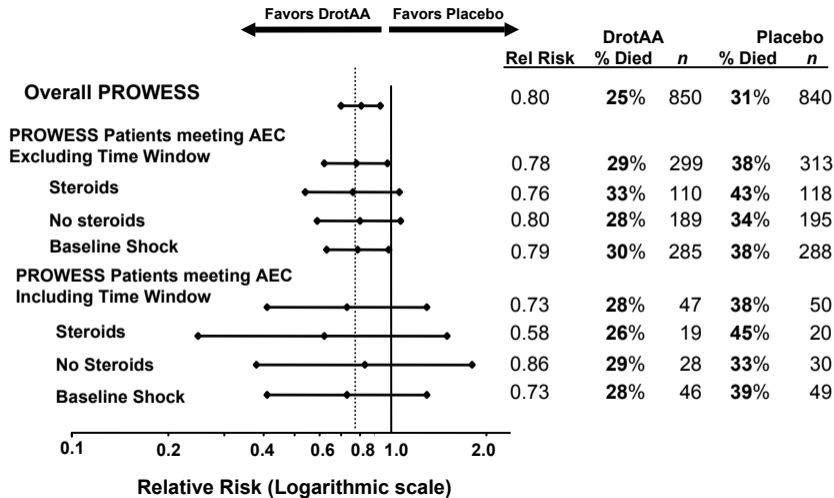

Supplement: MOESM3 [file 9721144]
